# Supplementary material
Source: publisher figshare collection journal article supplement (https://frontiersin.figshare.com/ndownloader/files/26335360)

**Fig. S3.** Residence period (hours) of Caribbean reef sharks throughout the study period, used as a basis to identify tags that were potentially no longer tracking intended animals.


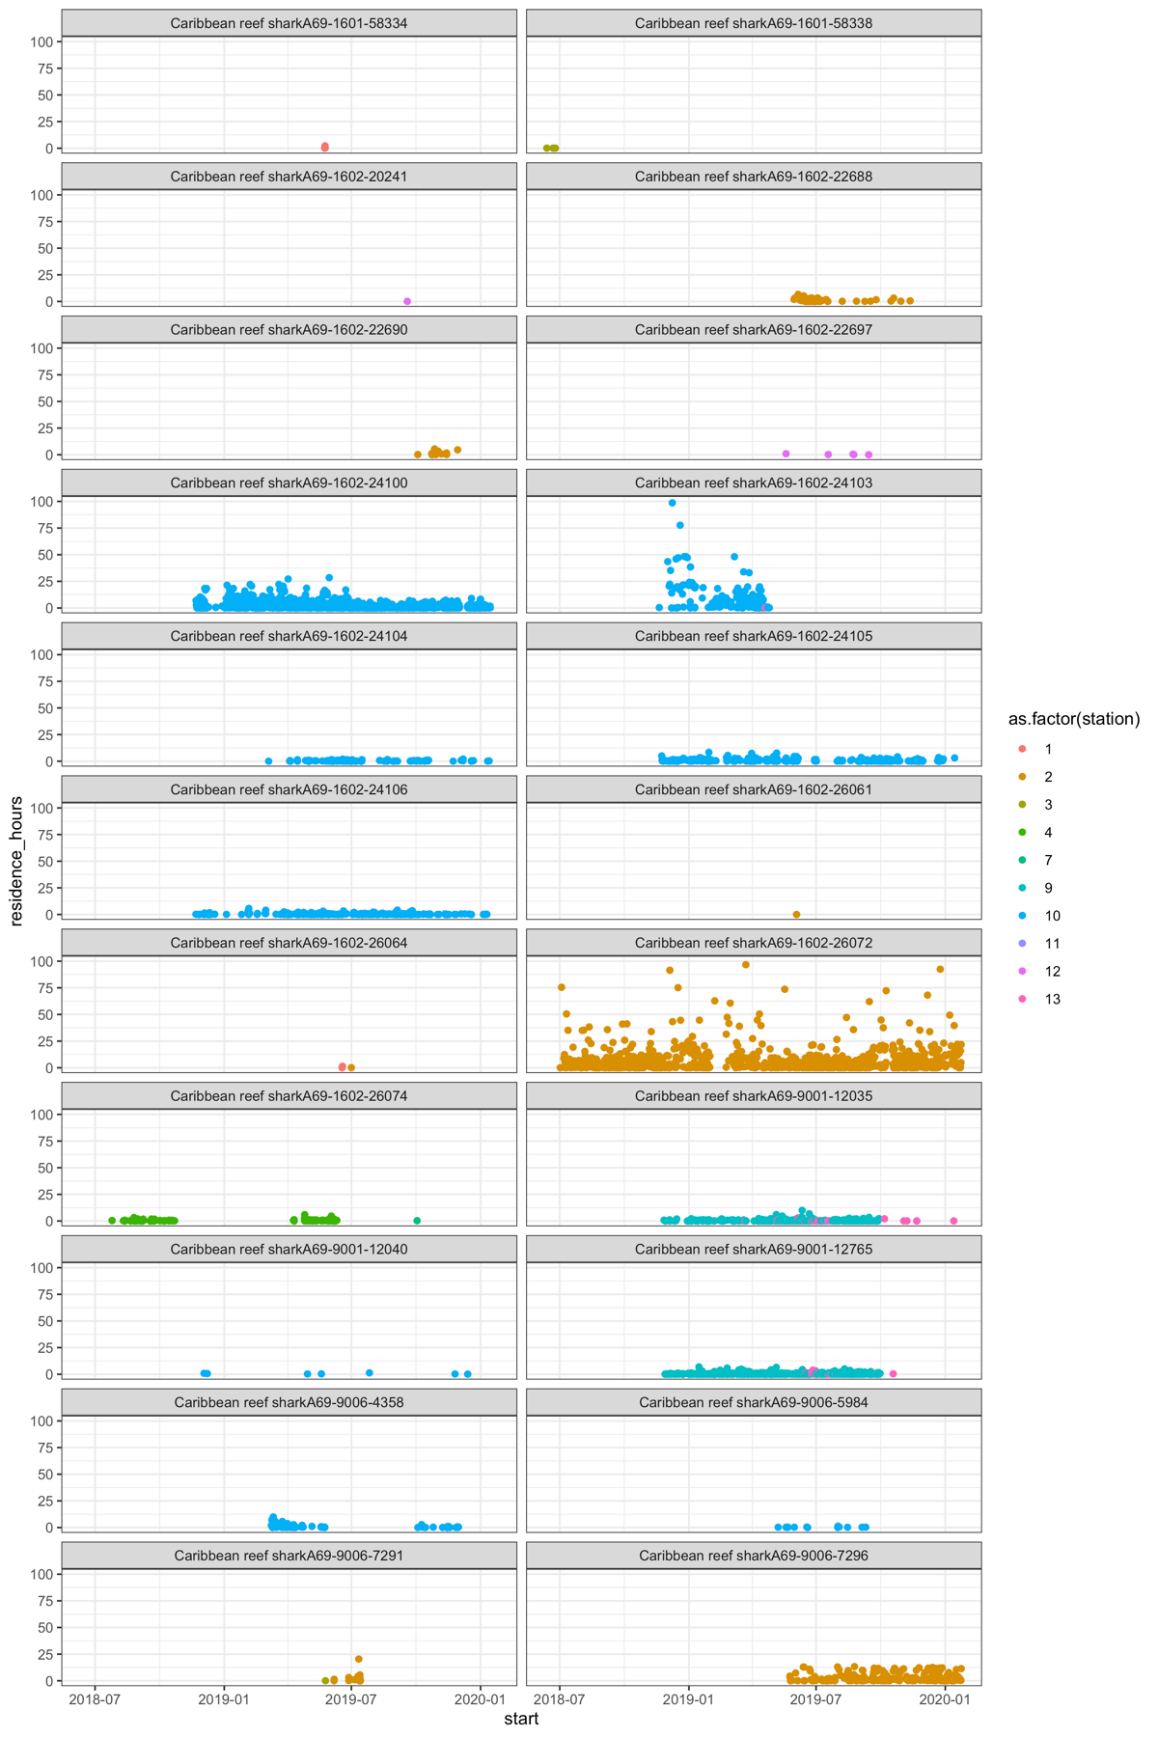

Supplement: Supplementary file 1 [file 26335360]
